# Supplementary material for: Voltammetric Immunosensor to Track a Major Peanut Allergen (Ara h 1) in Food Products Employing Quantum Dot Labels
Source: MDPI journal article supplement (doi:10.3390/bios11110426), 2021-10-29
Supplement: s1 [file s1]

Supplementary material

# Voltammetric immunosensor to track a major peanut allergen (Ara h 1) in food products employing quantum dot labels

Maria Freitas, Henri P.A. Nouws \* and Cristina Delerue-Matos

REQUIMTE/LAQV, Instituto Superior de Engenharia do Porto, Instituto Politécnico do Porto, Rua Dr. António Bernardino de Almeida 431, 4200-072 Porto, Portugal; maria.freitas@graq.issep.ipp.pt (M.F.); cmm@isep.ipp.pt (C.D.-M.)

\* Correspondence: han@isep.ipp.pt

**Table S1.** Time optimization of distinct assay strategies based on a combination of steps.

| Strategy | Assay step    |              |           |           | Assay Time (min) |
|----------|---------------|--------------|-----------|-----------|------------------|
|          | Blocker (min) | Target (min) | DAb (min) | QDs (min) |                  |
| i        | 30            | 60           | 60        | 30        | 180              |
| ii       | 30            | 60           |           | 60        | 150              |
| iii      | 30            | 60           |           | 30        | 120              |
| iv       | 30            |              | 60        |           | 90               |
| v        | 30            | 30           |           | 30        | 90               |
| vi       | --            | 30           |           | 30        | 60               |

**Table S2.** Studied and selected variables for the analysis of Ara h 1.

| Experimental variable                      | Tested range | Selected value |
|--------------------------------------------|--------------|----------------|
| [CAB] ( $\mu\text{g}\cdot\text{mL}^{-1}$ ) | 2.5 – 50     | 10             |
| [DAb] (Dilution Factor)                    | 100 – 500    | 250            |
| t (Ara h 1 & DAb) (min)                    | 30 – 60      | 30             |
| t (QD-strep) (min)                         | 0 – 30       | 30             |
| C [QD-strep] (nM)                          | 2.5 – 10     | 5.0            |
| BSA addition to QD-strep (%)               | 0.5 – 2.0    | 2.0            |

**Table S3.** Analytical characteristics of the developed electrochemical immunosensor for the analysis of Ara h 1.

| Figures of merit                                                                         | Ara h 1   |
|------------------------------------------------------------------------------------------|-----------|
| Concentration interval ( $\text{ng}\cdot\text{mL}^{-1}$ )                                | 25 - 1000 |
| Correlation coefficient (r)                                                              | 0.998     |
| Slope (m) ( $\text{nA}/(\text{ng}\cdot\text{mL}^{-1})$ )                                 | 1.82      |
| Standard deviation of the slope ( $S_m$ ) ( $\text{nA}/(\text{ng}\cdot\text{mL}^{-1})$ ) | 0.05      |
| Intercept (b) (nA)                                                                       | 66        |
| Standard deviation of the intercept ( $S_a$ ) (nA)                                       | 22        |
| Standard deviation of the linear regression ( $S_{y/x}$ )                                | 36        |
| Standard deviation of the method ( $S_{x0}$ ) ( $\text{ng}\cdot\text{mL}^{-1}$ )         | 20        |
| Coefficient of variation of the method ( $V_{x0}$ ) (%)                                  | 6.1       |
| Limit of detection (LOD) ( $\text{ng}\cdot\text{mL}^{-1}$ )                              | 3.5       |
| Limit of quantification (LOQ) ( $\text{ng}\cdot\text{mL}^{-1}$ )                         | 12        |

Table S4. Results of the recovery studies.

| Added (ng·mL <sup>-1</sup> ) | Found (ng·mL <sup>-1</sup> ) | Recovery (%) | RSD (%) |
|------------------------------|------------------------------|--------------|---------|
| 100                          | 102                          | 102          | 6.22    |
| 250                          | 262                          | 105          | 6.79    |
| 500                          | 558                          | 112          | 2.86    |
| 1000                         | 1091                         | 109          | 3.46    |

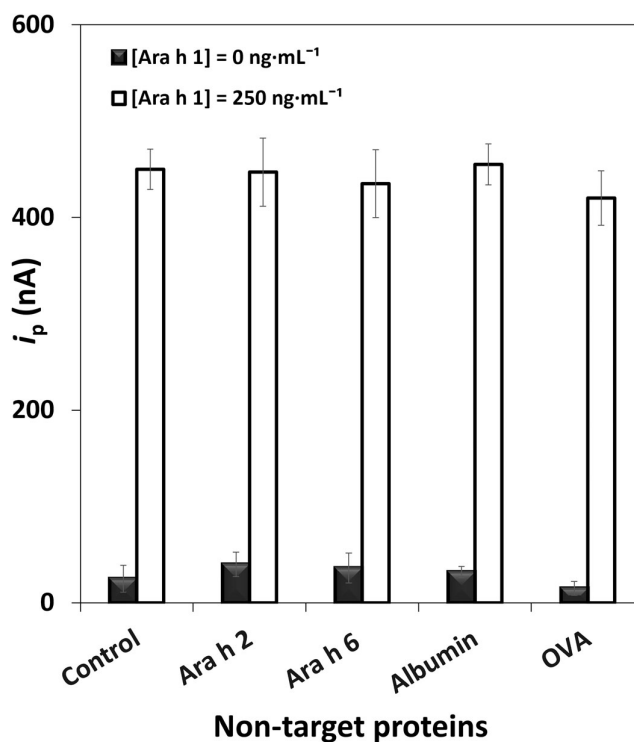

Figure S1. Results from the interference (light grey bars, Ara h 1: 250 ng·mL<sup>-1</sup>) and selectivity (dark grey bars) studies using non-target proteins: Ara h 2 (5.0 ng·mL<sup>-1</sup>), Ara h 6 (2.0 ng·mL<sup>-1</sup>), albumin (55 mg·mL<sup>-1</sup>), and OVA (100 mg·mL<sup>-1</sup>).
